# Supplementary material for: The role of the molecular formula of ZnCl2·nH2O on its catalyst activity: a systematic study of zinc chloride hydrates in the catalytic valorisation of cellulosic biomass
Source: Royal Society of Chemistry journal article supplement (doi:10.1039/c9cy00846b), 2019-01-01
Supplement: c9cy00846b1.pdf [file c9cy00846b1.pdf]

## Supporting Information

### The role of the molecular formula of $\text{ZnCl}_2 \cdot n\text{H}_2\text{O}$ on its catalyst activity: A systematic study of zinc chloride hydrates in the catalytic valorisation of cellulosic biomass

Iurii Bodachivskyi,<sup>a</sup> Unnikrishnan Kuzhiumparambil<sup>b</sup> and D. Bradley G. Williams<sup>\*,a</sup>

a. University of Technology Sydney, School of Mathematical and Physical Sciences, PO Box 123 Broadway NSW 2007, Australia.

b. University of Technology Sydney, Climate Change Cluster (C3), PO Box 123 Broadway NSW 2007, Australia.

\*Email: Bradley.Williams@uts.edu.au

**Abstract:** The present work demonstrates a functionality of zinc chloride hydrate solvents in catalytic processing of cellulosic materials into value added small molecules. We conduct a systematic study of  $\text{ZnCl}_2 \cdot n\text{H}_2\text{O}$  ( $n = 2.5\text{--}4.5$ ) and its activity in varied model transformations based on refined saccharides and discover an optimal systems and conditions for the target catalytic processes. This enable the efficient and direct transformation of a range of low value substrates, such as lignocellulose and algal biomass, into significantly higher value chemicals, including small reducing saccharides, 5-(hydroxymethyl)furfural, furyl hydroxymethyl ketone and furfural.

DOI: 10.1039/x0xx00000x

## Supporting data

**Table S1.** The content of carbohydrates in cellulosic substrates<sup>a</sup>

| Substrate                                         | Glucans content (wt%) | Xylans content (wt%) |
|---------------------------------------------------|-----------------------|----------------------|
| Hemicellulose (obtained from Corncob)             | 9                     | 60                   |
| Algal sugars (obtained from <i>Ulva lactuca</i> ) | 63                    | 0                    |
| Corncob                                           | 37                    | 29                   |
| Wood chips (softwood)                             | 48                    | 18                   |
| <i>Ulva lactuca</i>                               | 36                    | 5                    |
| <i>P. Cruentum</i>                                | 11                    | 12                   |

<sup>a</sup> The content of carbohydrates was established by standard analytical methods and is specified in wt% based on the dry substrate.<sup>1,2</sup> Other polysaccharides (despite glucans and xylans) were identified in trace amounts.

**Table S2.** Dissolution and regeneration of microcrystalline cellulose in/from  $\text{ZnCl}_2 \cdot n\text{H}_2\text{O}$  ( $n = 2.5\text{--}3.5$ )<sup>a</sup>

| Solvent                                      | Mass loss (wt%) |
|----------------------------------------------|-----------------|
| $\text{ZnCl}_2 \cdot 2.5\text{H}_2\text{O}$  | 18              |
| $\text{ZnCl}_2 \cdot 2.75\text{H}_2\text{O}$ | 17              |
| $\text{ZnCl}_2 \cdot 3.0\text{H}_2\text{O}$  | 14              |
| $\text{ZnCl}_2 \cdot 3.25\text{H}_2\text{O}$ | 11              |
| $\text{ZnCl}_2 \cdot 3.5\text{H}_2\text{O}$  | 5               |
| $\text{ZnCl}_2 \cdot 3.75\text{H}_2\text{O}$ | 5               |
| $\text{ZnCl}_2 \cdot 4.0\text{H}_2\text{O}$  | 3               |
| $\text{ZnCl}_2 \cdot 4.25\text{H}_2\text{O}$ | 0               |
| $\text{ZnCl}_2 \cdot 4.5\text{H}_2\text{O}$  | 0               |

<sup>a</sup> Mass loss is specified in wt% based on cellulose input. Dissolution conditions: cellulose (50 mg),  $\text{ZnCl}_2 \cdot n\text{H}_2\text{O}$  (5.000 g), 80 °C, 2.5 h.

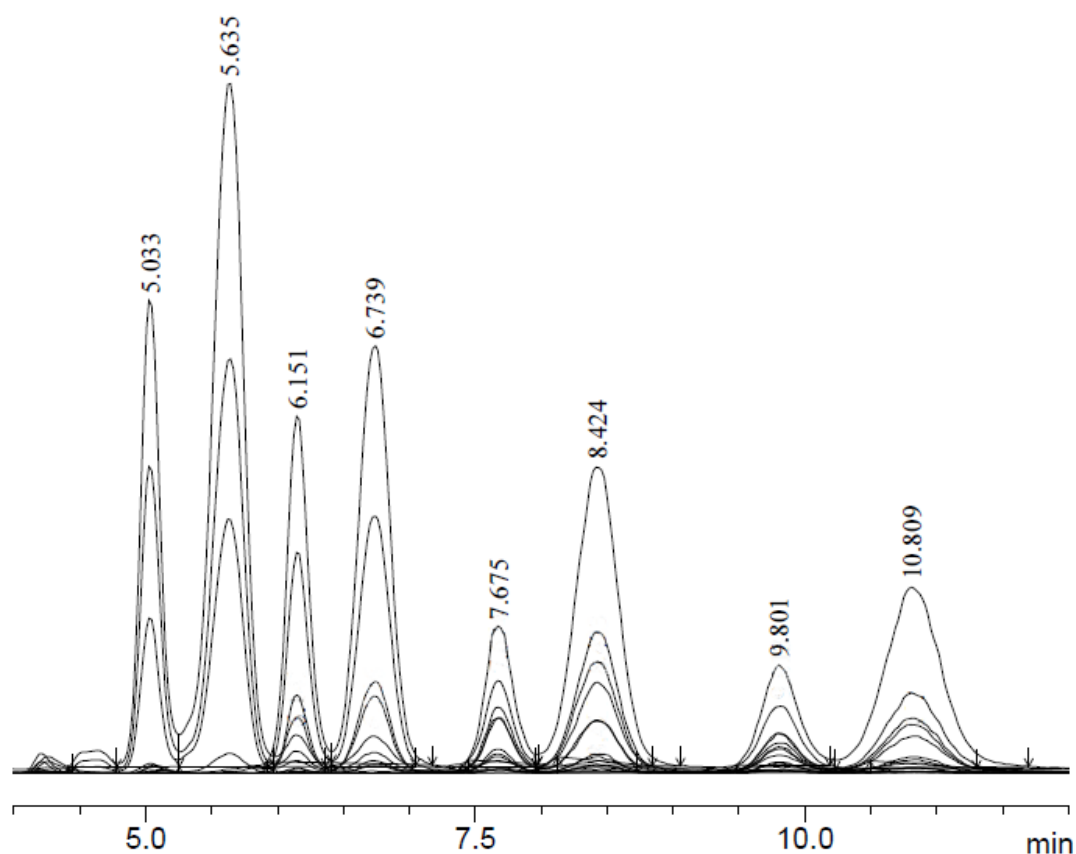

**Fig. S1.** LC-MS analysis of the recovered aqueous phase after the conversion of cellulose in  $\text{ZnCl}_2 \cdot 4.5\text{H}_2\text{O}$  (transitions  $m/z$  149.10  $\rightarrow$  89.05,  $m/z$  178.85  $\rightarrow$  89.15,  $m/z$  341.30  $\rightarrow$  161.20,  $m/z$  503.35  $\rightarrow$  161.20 and  $m/z$  665.25  $\rightarrow$  503.10 were monitored). Peaks at retention time of 5.033, 5.635, 6.151, 6.739, 8.424 and 10.809 are appropriate to fructose, glucose, cellobiulose, cellobiose, cellotriose and cellotetraose respectively. Peaks at retention time of 7.675 and 9.801 are considered to be *keto*-isomers of cellotriose and cellotetraose, respectively.

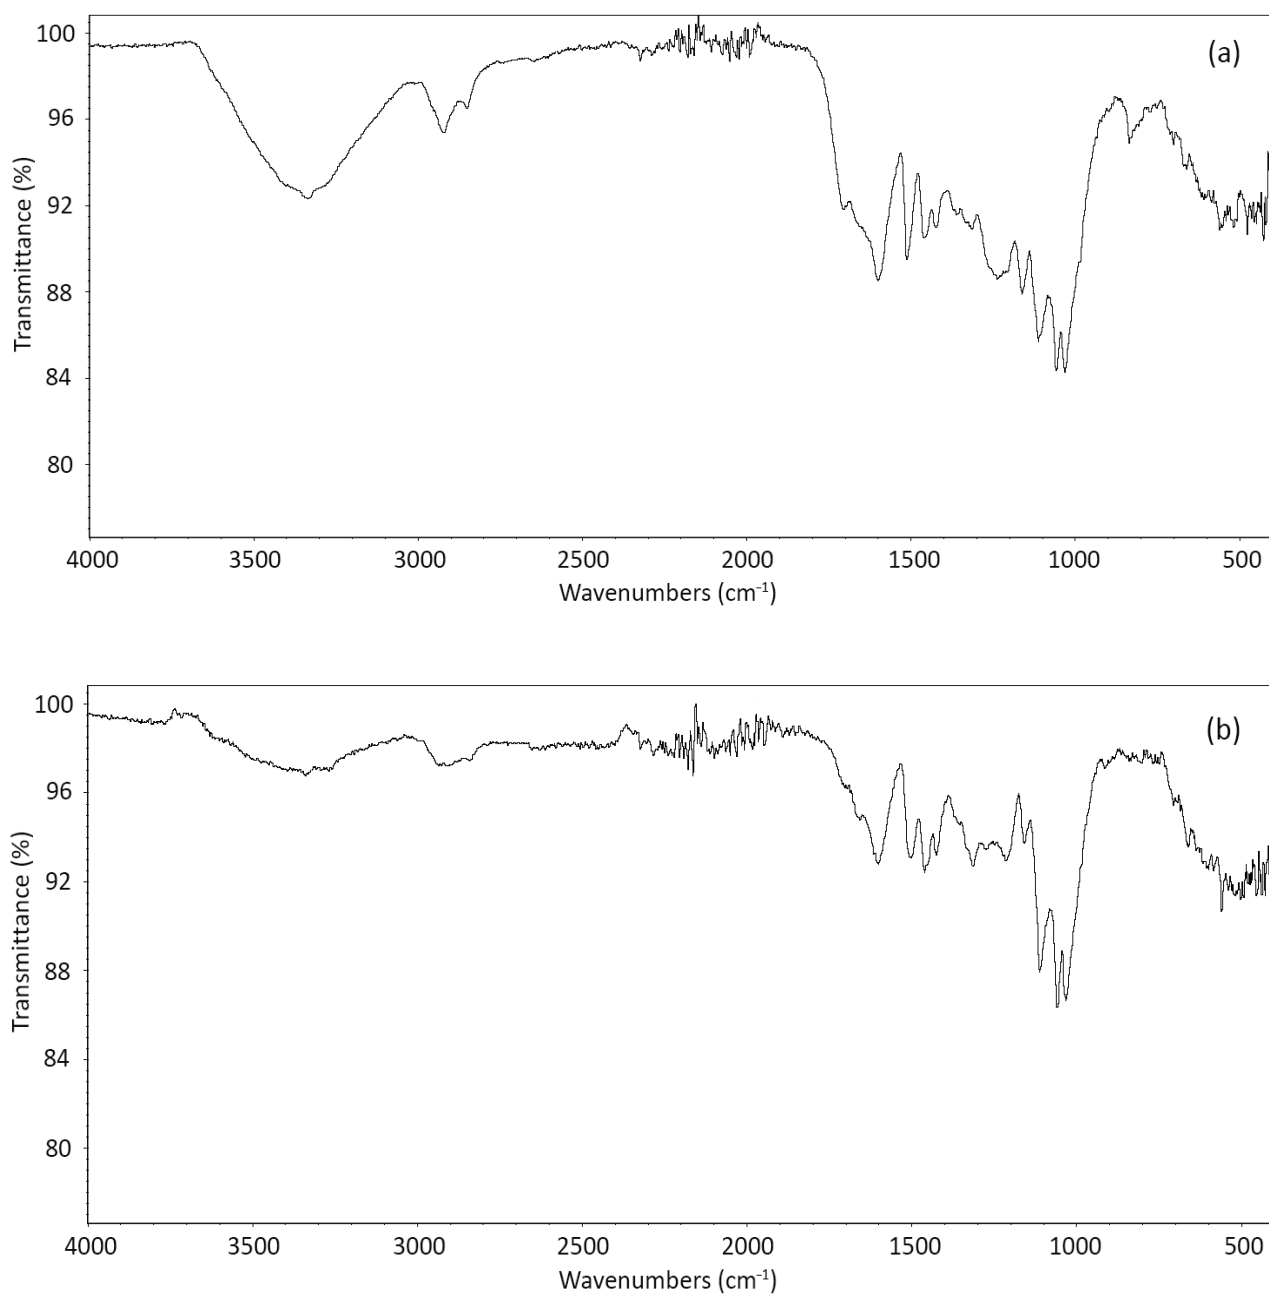

**Fig. S2.** IR spectra of lignin recovered after the acid-catalysed conversion of corncob (a) and softwood chips (b) in  $\text{ZnCl}_2 \cdot 4.5\text{H}_2\text{O}$ .

The assignment of IR spectra compares favourably with reported analytical data and is represented in Table S3.<sup>3</sup>

**Table S3.** Assignments of IR absorption bands of the recovered lignin<sup>3</sup>

| Absorption bands for<br>corn cob lignin (cm <sup>-1</sup> ) | Absorption bands for<br>softwood lignin (cm <sup>-1</sup> ) | Assignment                                  |
|-------------------------------------------------------------|-------------------------------------------------------------|---------------------------------------------|
| 3335                                                        | 3340                                                        | OH stretching                               |
| 2922                                                        | 2908                                                        | CH stretching of alkyl groups               |
| 1601, 1512, 1426                                            | 1601, 1501, 1425                                            | Aromatic skeletal vibration                 |
| 1460                                                        | 1460                                                        | Aromatic methyl group vibrations            |
| 1360                                                        | 1359                                                        | Aliphatic C–H stretch in CH <sub>3</sub>    |
| 1315                                                        | 1314                                                        | Syringyl ring breathing with C–O stretching |
| 1160                                                        | 1157                                                        | C–O stretch in ester groups                 |
| 1111, 1056, 1031                                            | 1111, 1058, 1032                                            | Aromatic C–H in-plane deformation           |

## References

- 1 A. Sluiter, B. Hames, R. Ruiz, C. Scarlata, J. Sluiter, D. Templeton and D. Crocker, *Determination of structural carbohydrates and lignin in biomass*, NREL/TP-510-42618, US National Renewable Energy Laboratory, Golden, Colorado, 2008.
- 2 S. Van Wycken and L.M.L. Laurens, *Determination of Total Carbohydrates in Algal Biomass*, NREL/TP-5100-60957, US National Renewable Energy Laboratory, Golden, Colorado, 2013.
- 3 S. H. Ghaffar, M. Fan, *Biomass Bioenergy*, 2013, **57**, 264–279.
